# Supplementary material
Source: MDPI journal article supplement (https://www.mdpi.com/1424-2818/14/10/795)
Supplement: s1 [file s1]

**Supplementary Material to:**

**Understory vegetation dynamics in non-native Douglas fir forests after management abandonment – a case study in two strict forest reserves in south-west Germany**

by Steffi Heinrichs, Michaela Dölle, Torsten Vor, Patricia Balcar & Wolfgang Schmidt

**Table S1.** Frequency of occurrence (F) in % and mean cover values and standard error in % ( $mCV \pm SE$ ) for all species surveyed on the 400 m<sup>2</sup> subplots in the core areas of the three strict forest reserves Grünberg, Eselskopf and Adelsberg for two observation times.

**Figure S1.** Impressions from the core areas of the strict forest reserves (SFRs) dominated by Douglas fir.

**Table S1:** Frequency of occurrence (F) in % and mean cover values and standard error in % (mCv±SE) for all species surveyed in the 400 m<sup>2</sup> subplots in the core areas of the three strict forest reserves Grünberg (GB), Eselskopf (EK, both characterized by Douglas fir (DF)) and Adelsberg (AB, dominated by native tree species (NAT) for two survey times. Species were grouped into the tree layer and into the field layer comprising the shrub layer (all woody species > 0.5 m < 5 m), the herb layer (all herbaceous species and woody species ≤ 0.5 m) and the moss layer (M, all ground dwelling bryophytes). Species in the field layer are ordered according to their temporal dynamics. Significant higher cover values between observations are indicated in bold according to Wilcoxon signed rank test. A significant increase or decrease was also assumed with frequency changes by at least 20 %. A significant increase by cover value and/or frequency is indicated **in blue**, a significant decrease **in orange**. Given are the Ellenberg Indicator values (EIV) for light (L), temperature (T), continentality (C), moisture (M), soil reaction (R) and nutrients (N) according to ELLENBERG et al. [55] and SIMMEL et al. [59] for N-values of bryophytes, and the association of field layer species to broad plant communities (Com) according to ELLENBERG et al. [59], OBERDORFER [61] and NEBEL & PHILIPPI [62]. Communities comprise deciduous forests of the class *Querceto-Fagetea* (QF), coniferous forests (CF) including the class *Vaccinio-Piceetea* (VP), communities of grasslands and heathlands (GH) including reed communities, communities of edges and clearings (Clear), communities of disturbed sites (Dist) and shrub vegetation represented by *Rubus fruticosus* agg. X = no community preference, often occurring in different communities, n.d. = community preference not defined due to non-native origin of species. For more details see text. FA gives the forest affinity according to SCHMIDT et al. [60] with 1.1 = species of closed forests, 1.2 = species of edges and clearings, 2.1 = species of forests and open habitats, 2.2. = species predominantly of open habitats, O = open habitat species (T = tree, S = shrub, H = herb, M = moss). nv = no value, ~ indicating changing water tables, = indicating temporal flooding. For references see main text.

|                                     | Com | FA | EIV |   |   |   |   |   | Grünberg (GB-DF) |          |          |          | Eselskopf (EK-DF) |          |          |          | Adelsberg (AB-DF) |          |          |          |
|-------------------------------------|-----|----|-----|---|---|---|---|---|------------------|----------|----------|----------|-------------------|----------|----------|----------|-------------------|----------|----------|----------|
|                                     |     |    | L   | T | C | M | R | N | n = 13           |          | n = 14   |          | n = 14            |          | n = 14   |          | n = 29            |          | n = 29   |          |
|                                     |     |    |     |   |   |   |   |   | 2005             | 2017     | 2005     | 2017     | 2005              | 2017     | 2001     | 2016     | 2001              | 2016     | 2001     | 2016     |
|                                     |     |    |     |   |   |   |   |   | F mCv±SE         | F mCv±SE | F mCv±SE | F mCv±SE | F mCv±SE          | F mCv±SE | F mCv±SE | F mCv±SE | F mCv±SE          | F mCv±SE | F mCv±SE | F mCv±SE |
| <b>Tree layer (&gt; 5 m height)</b> |     |    |     |   |   |   |   |   |                  |          |          |          |                   |          |          |          |                   |          |          |          |
| <i>Fagus sylvatica</i>              |     |    |     |   |   |   |   |   | 100              | 50.1±3.6 | 100      | 75.0±5.6 | 50                | 1.3±0.4  | 64       | 3.2±1.1  | 72                | 17.0±3.2 | 86       | 31.0±4.1 |
| <i>Pseudotsuga menziesii</i>        |     |    |     |   |   |   |   |   | 100              | 48.6±4.5 | 100      | 35.9±4.0 | 100               | 67.6±3.3 | 100      | 69.1±3.3 | .                 | .        | .        | .        |
| <i>Pinus sylvestris</i>             |     |    |     |   |   |   |   |   | 69               | 4.3±1.5  | 54       | 4.8±1.8  | .                 | .        | .        | .        | .                 | .        | .        | .        |
| <i>Picea abies</i>                  |     |    |     |   |   |   |   |   | 23               | 0.7±0.4  | 38       | 0.9±0.4  | 29                | 1.8±1.1  | 36       | 1.8±1.4  | .                 | .        | .        | .        |
| <i>Carpinus betulus</i>             |     |    |     |   |   |   |   |   | .                | .        | .        | .        | 43                | 1.3±0.5  | 57       | 2.4±0.8  | 45                | 5.0±1.6  | 66       | 9.4±2.0  |
| <i>Quercus petraea</i>              |     |    |     |   |   |   |   |   | .                | .        | .        | .        | 21                | 0.4±0.2  | 7        | 0.1±0.1  | 86                | 31.5±3.6 | 97       | 40.5±4.7 |
| <i>Betula pendula</i>               |     |    |     |   |   |   |   |   | .                | .        | .        | .        | 21                | 0.4±0.2  | 14       | 0.3±0.2  | .                 | .        | .        | .        |
| <i>Salix caprea</i>                 |     |    |     |   |   |   |   |   | .                | .        | .        | .        | 21                | 0.4±0.2  | 7        | 0.1±0.1  | .                 | .        | .        | .        |
| <i>Sorbus aucuparia</i>             |     |    |     |   |   |   |   |   | .                | .        | .        | .        | 21                | 0.4±0.3  | 7        | 0.2±0.2  | .                 | .        | .        | .        |
| <i>Corylus avellana</i>             |     |    |     |   |   |   |   |   | .                | .        | .        | .        | 7                 | 1.0±1.0  | 50       | 1.5±0.5  | .                 | .        | .        | .        |
| <i>Acer pseudoplatanus</i>          |     |    |     |   |   |   |   |   | .                | .        | .        | .        | 7                 | 0.2±0.2  | 7        | 0.4±0.3  | .                 | .        | .        | .        |
| <i>Tilia cordata</i>                |     |    |     |   |   |   |   |   | .                | .        | .        | .        | .                 | .        | .        | .        | 93                | 28.0±3.6 | 93       | 29.0±3.3 |

Table S1. Continued

| Field layer                                     | Com | FA   | EIV |    |    |    |    |    | Grünberg (GB-DF) |          |     |          | Eselskopf (EK-DF) |          |    |         | Adelsberg (AB-NAT) |          |     |         |
|-------------------------------------------------|-----|------|-----|----|----|----|----|----|------------------|----------|-----|----------|-------------------|----------|----|---------|--------------------|----------|-----|---------|
|                                                 |     |      | L   | T  | C  | M  | R  | N  | n = 13           |          |     |          | n = 14            |          |    |         | n = 29             |          |     |         |
|                                                 |     |      |     |    |    |    |    |    | 2005             | 2017     |     |          | 2005              | 2017     |    |         | 2001               | 2016     |     |         |
|                                                 |     |      |     |    |    |    |    |    | F mCv±SE         | F mCv±SE |     |          | F mCv±SE          | F mCv±SE |    |         | F mCv±SE           | F mCv±SE |     |         |
| <b>Significant increase in at least one SFR</b> |     |      |     |    |    |    |    |    |                  |          |     |          |                   |          |    |         |                    |          |     |         |
| <i>Picea abies</i>                              | VP  | T2.1 | 5   | 3  | 6  | x  | x  | x  | 100              | 8.6±1.6  | 100 | 15.4±3.2 | 64                | 2.3±1.0  | 64 | 0.8±0.2 | 3                  | +        | 10  | 0.2±0.1 |
| <i>Atrichum undulatum</i> (M)                   | QF  | M2.1 | 6   | x  | 5  | 6  | 4  | 5  | 69               | 0.2±0.1  | 85  | 0.7±0.1  | 71                | 0.9±0.2  | 79 | 1.0±0.3 | .                  | .        | 24  | 0.2±0.1 |
| <i>Eurhynchium striatum</i> (M)                 | x   | M1.1 | 5   | 6  | 3  | 5  | 6  | 5  | 15               | +        | 62  | 0.4±0.1  | 36                | 0.3±0.2  | 93 | 7.6±2.3 | .                  | .        | .   | .       |
| <i>Brachythecium rutabulum</i> (M)              | x   | M2.1 | 5   | x  | 5  | 4  | x  | 6  | .                | .        | 23  | 0.1±0.1  | 86                | 0.9±0.2  | .  | .       | 14                 | +        | 3   | +       |
| <i>Rhytidiadelphus loreus</i> (M)               | CF  | M1.1 | 4   | 3  | 4  | 6  | 3  | 2  | .                | .        | .   | .        | 50                | 0.4±0.2  | 71 | 2.7±1.1 | .                  | .        | .   | .       |
| <i>Quercus petraea</i>                          | QF  | T2.1 | 6   | 6  | 2  | 5  | x  | x  | .                | .        | .   | .        | 43                | 0.6±0.3  | 50 | 0.7±0.3 | 93                 | 0.4±0.0  | 100 | 1.9±0.6 |
| <i>Plagiomnium affine</i> (M)                   | CF  | M2.1 | 5   | 4  | 5  | 5  | 5  | 4  | .                | .        | .   | .        | 43                | 1.2±0.5  | 86 | 3.0±1.2 | .                  | .        | .   | .       |
| <i>Plagiomnium undulatum</i> (M)                | x   | M2.1 | 4   | 3  | 5  | 6  | 6  | 5  | .                | .        | .   | .        | 14                | 0.1±0.1  | 36 | 0.4±0.2 | .                  | .        | .   | .       |
| <i>Anemone nemorosa</i>                         | QF  | H2.1 | x   | x  | 3  | 5  | x  | x  | .                | .        | .   | .        | .                 | .        | .  | .       | 76                 | 0.1±0.0  | 97  | 0.8±0.1 |
| <i>Moehringia trinervia</i>                     | QF  | H1.1 | 4   | 5  | 3  | 5  | 6  | 7  | .                | .        | .   | .        | .                 | .        | 43 | 0.1±0.0 | 72                 | 0.2±0.0  | 62  | 0.3±0.0 |
| <i>Thuidium tamariscinum</i> (M)                | x   | M2.1 | 4   | 4  | 4  | 6  | 4  | 4  | .                | .        | 23  | 0.1±0.1  | .                 | .        | 57 | 2.0±1.1 | 10                 | +        | 10  | 0.1±0.0 |
| <i>Taraxacum officinale</i> agg.                | x   | H2.1 | 7   | x  | X  | 5  | x  | 8  | .                | .        | .   | .        | .                 | .        | 29 | +       | .                  | .        | .   | .       |
| <i>Plagiothecium laetum</i> (M)                 | x   | M2.1 | 4   | 3  | 6  | 4  | 2  | 4  | .                | .        | 8   | +        | .                 | .        | 43 | 0.2±0.1 | .                  | .        | 3   | +       |
| <i>Rhytidiadelphus triquetrus</i> (M)           | x   | M2.1 | 7   | 3  | 6  | 4  | 5  | 3  | .                | .        | .   | .        | .                 | .        | 36 | 0.6±0.3 | .                  | .        | .   | .       |
| <i>Scleropodium purum</i> (M)                   | CF  | M2.1 | 6   | 4  | 5  | 4  | 5  | 3  | .                | .        | .   | .        | .                 | .        | 29 | 1.8±1.1 | .                  | .        | .   | .       |
| <b>Significant decrease in at least one SFR</b> |     |      |     |    |    |    |    |    |                  |          |     |          |                   |          |    |         |                    |          |     |         |
| <i>Pseudotsuga menziesii</i>                    | nd  | T1.1 | nv  | nv | nv | nv | nv | nv | 100              | 11.7±1.9 | 92  | 1.2±0.2  | 100               | 20.7±3.4 | 71 | 4.6±2.8 | .                  | .        | .   | .       |
| <i>Rubus idaeus</i>                             | x   | S2.1 | 7   |    | X  | x  | x  | 6  | 77               | 0.8±0.2  | .   | .        | 36                | 0.2±0.1  | .  | .       | .                  | .        | .   | .       |
| <i>Polytrichum formosum</i> (M)                 | x   | M2.1 | 4   | 2  | 5  | 6  | 2  | 3  | 77               | 1.2±0.3  | 85  | 0.5±0.1  | 100               | 3.4±0.7  | 71 | 1.0±0.4 | 59                 | 0.8±0.2  | 45  | 0.5±0.1 |
| <i>Oxalis acetosella</i>                        | x   | H1.1 | 1   | x  | 3  | 5  | 4  | 6  | 62               | 0.4±0.1  | 15  | +        | 36                | 0.2±0.2  | 50 | 0.3±0.1 | 17                 | 0.1±0.0  | 3   | +       |
| <i>Pinus sylvestris</i>                         | x   | T2.1 | 7   | x  | 7  | x  | x  | x  | 54               | 0.7±0.3  | .   | .        | .                 | .        | .  | .       | 14                 | +        | .   | .       |
| <i>Poa nemoralis</i>                            | QF  | H2.1 | 5   | x  | 5  | 5  | 5  | 4  | 54               | 0.4±0.2  | .   | .        | 43                | 0.4±0.2  | 29 | 0.1±0.0 | 24                 | 0.1±0.1  | 10  | 0.1±0.0 |
| <i>Dryopteris filix-mas</i>                     | QF  | H1.1 | 3   | x  | 3  | 5  | 5  | 6  | 46               | 0.1±0.1  | .   | .        | 100               | 1.0±0.1  | 57 | 0.2±0.1 | 10                 | +        | 14  | 0.1±0.0 |
| <i>Vaccinium myrtillus</i>                      | x   | H2.1 | 5   | x  | 5  | x  | 2  | 3  | 46               | 0.3±0.1  | .   | .        | .                 | .        | .  | .       | 7                  | 0.1±0.1  | 10  | 0.6±0.5 |
| <i>Dicranum scoparium</i> (M)                   | VP  | M2.1 | 5   | x  | 5  | 4  | 4  | 2  | 46               | 0.2±0.1  | 15  | 0.1±0.1  | 100               | 2.8±0.7  | 57 | 0.9±0.5 | 76                 | 1.0±0.3  | 31  | 0.2±0.0 |
| <i>Cytisus scoparius</i>                        | QF  | S2.2 | 8   | 5  | 2  | 4  | 3  | 4  | 38               | 0.1±0.1  | .   | .        | 21                | +        | .  | .       | .                  | .        | 3   | +       |
| <i>Viola riviniana</i>                          | QF  | H2.1 | 5   | x  | 3  | 4  | 4  | x  | 38               | +        | .   | .        | .                 | .        | .  | .       | 3                  | +        | .   | .       |

|                                                             | Com   | FA   | EIV |    |    |    |    |    | Grünberg (GB-DF) |          |          |          | Eselskopf (EK-DF) |          |          |          | Adelsberg (AB-NAT) |          |    |          |
|-------------------------------------------------------------|-------|------|-----|----|----|----|----|----|------------------|----------|----------|----------|-------------------|----------|----------|----------|--------------------|----------|----|----------|
|                                                             |       |      |     |    |    |    |    |    | n = 13           |          | n = 14   |          | n = 14            |          | n = 29   |          | n = 29             |          |    |          |
|                                                             |       |      | L   | T  | C  | M  | R  | N  | 2005             | 2017     | 2005     | 2017     | 2005              | 2017     | 2001     | 2016     | 2001               | 2016     |    |          |
|                                                             |       |      |     |    |    |    |    |    | F mCv±SE         | F mCv±SE | F mCv±SE | F mCv±SE | F mCv±SE          | F mCv±SE | F mCv±SE | F mCv±SE | F mCv±SE           | F mCv±SE |    |          |
| Carex pilulifera                                            | GH    | H2.1 | 5   | x  | 2  | 5~ | 3  | 3  | 31               | 0.1±0.0  | 8        | +        | .                 | .        | .        | .        | 7                  | 0.1±0.0  | 10 | 0.1±0.0  |
| Gymnocarpium dryopteris                                     | QF    | H1.1 | 3   | 4  | 5  | 6  | 4  | 5  | 31               | 0.1±0.1  | .        | .        | 7                 | +        | .        | .        | .                  | .        | .  | .        |
| Mycelis muralis                                             | Dist  | H2.1 | 4   | 6  | 2  | 5  | x  | 6  | 31               | +        | .        | .        | .                 | .        | .        | .        | 38                 | 0.1±0.0  | 17 | +        |
| Epilobium angustifolium                                     | Clear | H1.2 | 8   | x  | 5  | 5  | 5  | 8  | 23               | +        | .        | .        | 21                | 0.1±0.0  | .        | .        | .                  | .        | .  | .        |
| Hypericum pulchrum                                          | QF    | H2.1 | 4   | 6  | 2  | 5  | 3  | 2  | 23               | +        | .        | .        | 71                | 0.3±0.1  | 36       | 0.1±0.0  | .                  | .        | .  | .        |
| Epilobium parviflorum                                       | GH    | O    | 7   | 5  | 3  | 9= | 8  | 6  | 15               | +        | .        | .        | 57                | 0.2±0.1  | .        | .        | .                  | .        | .  | .        |
| Hylocomium splendens (M)                                    | CF    | M2.1 | 6   | 3  | 6  | 4  | 5  | 2  | 15               | +        | .        | .        | 79                | 1.6±0.8  | 57       | 2.6±1.5  | .                  | .        | 7  | +        |
| Athyrium filix-femina                                       | x     | H2.1 | 3   | x  | 3  | 7  | x  | 6  | 8                | +        | .        | .        | 29                | 0.1±0.1  | .        | .        | .                  | .        | .  | .        |
| Luzula luzuloides                                           | QF    | H2.1 | 4   | x  | 4  | 5  | 3  | 4  | 8                | +        | .        | .        | 21                | 0.1±0.0  | 14       | +        | 24                 | 0.1±0.0  | .  | .        |
| Teucrium scorodonia                                         | QF    | H2.1 | 6   | 5  | 2  | 4  | 2  | 3  | .                | .        | .        | .        | 93                | 1.3±0.2  | 57       | 0.2±0.1  | .                  | .        | .  | .        |
| Carpinus betulus                                            | QF    | T1.1 | 4   | 6  | 4  | x  | x  | x  | .                | .        | .        | .        | 86                | 7.2±3.0  | 50       | 5.1±3.1  | 55                 | 2.3±0.7  | 59 | 0.8±0.3  |
| Sambucus racemosa                                           | Clear | S2.1 | 6   | 4  | 4  | 5  | 5  | 8  | .                | .        | .        | .        | 71                | 0.2±0.1  | .        | .        | .                  | .        | .  | .        |
| Senecio ovatus                                              | Clear | H1.2 | 7   | x  | 4  | 5  | x  | 8  | .                | .        | .        | .        | 71                | 0.3±0.1  | .        | .        | .                  | .        | .  | .        |
| Deschampsia flexuosa                                        | x     | H2.1 | 6   | x  | 2  | x  | 2  | 3  | .                | .        | .        | .        | 64                | 1.0±0.4  | 29       | 0.2±0.1  | 10                 | 0.3±0.2  | 10 | 0.3±0.2  |
| Dactylis polygama                                           | QF    | H1.1 | 5   | 6  | 4  | 5  | 6  | 5  | .                | .        | .        | .        | 36                | 0.1±0.1  | .        | .        | .                  | .        | .  | .        |
| Impatiens noli-tangere                                      | QF    | H1.1 | 4   | 5  | 5  | 7  | 7  | 6  | .                | .        | .        | .        | 29                | 0.1±0.0  | .        | .        | .                  | .        | .  | .        |
| Quercus robur                                               | QF    | T2.1 | 7   | 6  | 6  | x  | x  | x  | .                | .        | .        | .        | 29                | 0.2±0.1  | .        | .        | .                  | .        | .  | .        |
| Lophocolea bidentata (M)                                    | x     | M2.1 | 7   | 3  | 5  | 6  | 5  | 3  | .                | .        | .        | .        | 29                | 0.1±0.1  | .        | .        | .                  | .        | .  | .        |
| Urtica dioica                                               | Dist  | H2.1 | x   | x  | x  | 6  | 7  | 9  | .                | .        | .        | .        | 21                | +        | .        | .        | 7                  | 0.2±0.2  | 3  | +        |
| Plagiothecium denticulatum (M)                              | CF    | M2.1 | 5   | x  | 5  | 4  | 5  | 5  | .                | .        | .        | .        | 21                | 0.1±0.0  | .        | .        | 10                 | +        | .  | .        |
| Dicranum montanum                                           | x     | M2.1 | 6   | 3  | 6  | 5  | 2  | 3  | .                | .        | .        | .        | .                 | .        | .        | .        | 21                 | +        | .  | .        |
| Contrary development in significant changes across reserves |       |      |     |    |    |    |    |    |                  |          |          |          |                   |          |          |          |                    |          |    |          |
| Rubus fruticosus agg.                                       | Shrub | S2.1 | nv  | nv | nv | nv | nv | nv | 69               | 1.5±0.8  | 46       | 1.2±0.6  | 100               | 3.2±0.5  | 93       | 1.6±0.5  | 38                 | 1.7±1.4  | 52 | 10.4±3.7 |
| Dryopteris carthusiana                                      | x     | H2.1 | 5   | x  | 3  | x  | 4  | 3  | 54               | 0.2±0.1  | .        | .        | 57                | 0.3±0.1  | 79       | 0.3±0.1  | 52                 | 0.1±0.0  | 21 | 0.1±0.0  |
| Hypnum cupressiforme var. cupressiforme (M)                 | x     |      |     |    |    |    |    |    |                  |          |          |          |                   |          |          |          |                    |          |    |          |

Table A1. Continued

|                                                            | Com   | FA   | EIV |   |   |    |   | Grünberg (GB-DF) |          |   |   | Eselskopf (EK-DF) |          |   |   | Adelsberg (AB-NAT) |          |   |   |
|------------------------------------------------------------|-------|------|-----|---|---|----|---|------------------|----------|---|---|-------------------|----------|---|---|--------------------|----------|---|---|
|                                                            |       |      | L   | T | C | M  | R | n = 13           |          |   |   | n = 14            |          |   |   | n = 29             |          |   |   |
|                                                            |       |      |     |   |   |    | N | 2005             | 2017     |   |   | 2005              | 2017     |   |   | 2001               | 2016     |   |   |
|                                                            |       |      |     |   |   |    |   | F mCv±SE         | F mCv±SE |   |   | F mCv±SE          | F mCv±SE |   |   | F mCv±SE           | F mCv±SE |   |   |
| <i>Anthoxanthum odoratum</i>                               | x     | H2.1 | x   | x | x | x  | 5 | x                | 15       | + | . | .                 | .        | . | . | .                  | .        | . | . |
| <i>Stellaria media</i>                                     | Dist  | H2.2 | 6   | x | x | x  | 7 | 8                | 8        | + | . | 7                 | +        | . | . | .                  | .        | . | . |
| <i>Diplophyllum albicans</i> (M)                           | x     | M2.1 | 4   | x | 4 | 4  | 2 | 1                | 8        | + | . | .                 | .        | . | . | .                  | .        | . | . |
| <i>Rhizomnium punctatum</i> (M)                            | CF    | M1.1 | 3   | 3 | 4 | 6  | 4 | 4                | 8        | + | . | .                 | .        | . | . | 7                  | +        | . | . |
| <i>Holcus lanatus</i>                                      | GH    | H2.2 | 7   | 6 | 3 | 6  | x | 5                | .        | . | . | 14                | +        | . | . | .                  | .        | . | . |
| <i>Rosa canina</i>                                         | QF    | S2.1 | 8   | 5 | 3 | 4  | x | x                | .        | . | . | 14                | +        | . | . | .                  | .        | . | . |
| <i>Stellaria holostea</i>                                  | QF    | H1.1 | 5   | 6 | 3 | 5  | 6 | 5                | .        | . | . | 14                | 0.1±0.0  | . | . | .                  | .        | . | . |
| <i>Cirsium vulgare</i>                                     | Dist  | H2.2 | 8   | 5 | 3 | 5  | 7 | 8                | .        | . | . | 7                 | +        | . | . | .                  | .        | . | . |
| <i>Fragaria vesca</i>                                      | Clear | H2.1 | 7   | x | 5 | 5  | x | 6                | .        | . | . | 7                 | +        | . | . | .                  | .        | . | . |
| <i>Geranium robertianum</i>                                | Dist  | H2.1 | 5   | x | 3 | x  | x | 7                | .        | . | . | 7                 | +        | . | . | 10                 | 0.1±0.0  | . | . |
| <i>Lonicera periclymenum</i>                               | QF    | S2.1 | 6   | 5 | 2 | x  | 3 | 3                | .        | . | . | 7                 | +        | . | . | .                  | .        | . | . |
| <i>Salix caprea</i>                                        | Clear | T2.1 | 7   | x | 3 | 6  | 7 | 7                | .        | . | . | 7                 | 0.1±0.1  | . | . | .                  | .        | . | . |
| <i>Solidago virgaurea</i>                                  | x     | H2.1 | 5   | x | x | 5  | x | 4                | .        | . | . | 7                 | +        | . | . | .                  | .        | . | . |
| <i>Valeriana officinalis</i>                               | GH    | H2.1 | 7   | 6 | 5 | 8~ | 7 | 5                | .        | . | . | 7                 | +        | . | . | .                  | .        | . | . |
| <i>Hedwegia ciliata</i> .var. <i>ciliata</i> (M)           | x     | M2.2 | 9   | x | 5 | 2  | 2 | 1                | .        | . | . | 7                 | 0.3±0.3  | . | . | 3                  | +        | . | . |
| <i>Genista tinctoria</i>                                   | GH    | H2.1 | 8   | 6 | 3 | 6~ | 6 | 1                | .        | . | . | .                 | .        | . | . | 10                 | +        | . | . |
| <i>Lapsana communis</i>                                    | Dist  | H2.1 | 5   | 6 | 3 | 5  | x | 7                | .        | . | . | .                 | .        | . | . | 10                 | +        | . | . |
| <i>Scrophularia nodosa</i>                                 | QF    | H2.1 | 4   | 5 | 3 | 6  | 6 | 7                | .        | . | . | .                 | .        | . | . | 10                 | +        | . | . |
| <i>Calamagrostis arundinacea</i>                           | x     | H2.1 | 6   | 5 | 4 | 5  | 4 | 5                | .        | . | . | .                 | .        | . | . | 7                  | +        | . | . |
| <i>Brachythecium salebrosum</i> var. <i>salebrosum</i> (M) | x     | M2.1 | 6   | 4 | 5 | 4  | 6 | 5                | .        | . | . | .                 | .        | . | . | 7                  | 0.1±0.1  | . | . |
| <i>Paraleucobryum longifolium</i> (M)                      | QF    | M1.1 | 4   | 3 | 6 | 4  | 1 | 2                | .        | . | . | .                 | .        | . | . | 7                  | +        | . | . |
| <i>Holcus mollis</i>                                       | QF    | H2.1 | 5   | 5 | 2 | 5  | 2 | 3                | .        | . | . | .                 | .        | . | . | 3                  | +        | . | . |
| <i>Vicia sepium</i>                                        | x     | H2.1 | x   | x | 5 | 5  | 6 | 5                | .        | . | . | .                 | .        | . | . | 3                  | +        | . | . |
| <i>Cephaloziella divaricata</i> (M)                        | x     | M2.2 | 9   | x | 5 | 2  | 4 | 2                | .        | . | . | .                 | .        | . | . | 3                  | +        | . | . |
| <i>Dicranum viride</i> (M)                                 | QF    | M1.1 | 5   | 5 | 7 | 5  | 7 | nv               | .        | . | . | .                 | .        | . | . | 3                  | +        | . | . |
| <i>Lophozia bicrenata</i> (M)                              | x     | M2.2 | 8   | x | 4 | 3  | 2 | 1                | .        | . | . | .                 | .        | . | . | 3                  | +        | . | . |
| <i>Plagiothecium cavifolium</i> (M)                        | x     | M1.1 | 4   | 2 | 6 | 5  | 6 | 2                | .        | . | . | .                 | .        | . | . | 3                  | +        | . | . |
| <i>Pohlia nutans</i> (M)                                   | x     | M2.1 | 5   | x | 5 | 4  | 2 | nv               | .        | . | . | .                 | .        | . | . | 3                  | +        | . | . |

Table S1. Continued

|                                                                        | Com   | FA   | EIV |    |    |    |    |    | Grünberg (GB-DF) |          |     |         | Eselskopf (EK-DF) |          |     |         | Adelsberg (AB-NAT) |          |    |         |
|------------------------------------------------------------------------|-------|------|-----|----|----|----|----|----|------------------|----------|-----|---------|-------------------|----------|-----|---------|--------------------|----------|----|---------|
|                                                                        |       |      | L   | T  | C  | M  | R  | N  | n = 13           |          |     |         | n = 14            |          |     |         | n = 29             |          |    |         |
|                                                                        |       |      |     |    |    |    |    |    | 2005             | 2017     |     |         | 2005              | 2017     |     |         | 2001               | 2016     |    |         |
|                                                                        |       |      |     |    |    |    |    |    | F mCv±SE         | F mCv±SE |     |         | F mCv±SE          | F mCv±SE |     |         | F mCv±SE           | F mCv±SE |    |         |
| <i>Scapania nemorea</i> (M)                                            | x     | M2.1 | 4   | 4  | 5  | 5  | 2  | 2  | .                | .        | .   | .       | .                 | .        | .   | .       | 3                  | +        | .  | .       |
| <i>Tetraphis pellucida</i> (M)                                         | x     | M2.1 | 3   | 3  | 5  | 6  | 1  | 3  | .                | .        | .   | .       | .                 | .        | .   | .       | 3                  | +        | .  | .       |
| <b>Newly occurring across SFR</b>                                      |       |      |     |    |    |    |    |    |                  |          |     |         |                   |          |     |         |                    |          |    |         |
| <i>Pinus strobus</i>                                                   | nd    | T1.1 | nv  | nv | nv | nv | nv | nv | .                | .        | 15  | +       | .                 | .        | .   | .       | .                  | .        | .  | .       |
| <i>Bryum capillare</i> (M)                                             | x     | M2.1 | 5   | x  | 5  | 5  | 6  | 4  | .                | .        | 8   | +       | .                 | .        | .   | .       | .                  | .        | 3  | +       |
| <i>Eurhynchium praelongum</i> (M)                                      | x     | M2.1 | 6   | 4  | 5  | 6  | 5  | 5  | .                | .        | .   | .       | .                 | .        | 14  | 0.1±0.1 | .                  | .        | .  | .       |
| <i>Polygonatum multiflorum</i>                                         | QF    | H1.1 | 2   | x  | 5  | 5  | 6  | 5  | .                | .        | .   | .       | .                 | .        | 7   | +       | .                  | .        | .  | .       |
| <i>Polygonatum verticillatum</i>                                       | OF    | H2.1 | 4   | 4  | 2  | 5  | 4  | 5  | .                | .        | .   | .       | .                 | .        | 7   | +       | .                  | .        | .  | .       |
| <i>Fissidens bryoides</i> (M)                                          | x     | M2.1 | 4   | x  | 5  | 5  | 6  | 5  | .                | .        | .   | .       | .                 | .        | 7   | +       | .                  | .        | .  | .       |
| <i>Ptilium crista-castrensis</i> (M)                                   | CF    | M1.2 | 4   | 2  | 6  | 6  | 3  | 2  | .                | .        | .   | .       | .                 | .        | .   | .       | .                  | .        | 7  | +       |
| <i>Carex sylvatica</i>                                                 | QF    | H1.1 | 2   | 5  | 3  | 5  | 6  | 5  | .                | .        | .   | .       | .                 | .        | .   | .       | .                  | .        | 3  | +       |
| <b>No consistent change or only small changes over time across SFR</b> |       |      |     |    |    |    |    |    |                  |          |     |         |                   |          |     |         |                    |          |    |         |
| <i>Fagus sylvatica</i>                                                 | QF    | T1.1 | 3   | 5  | 2  | 5  | x  | x  | 100              | 6.1±0.9  | 100 | 4.4±1.1 | 86                | 2.0±0.5  | 100 | 2.6±0.5 | 93                 | 7.4±1.5  | 97 | 7.2±1.2 |
| <i>Mnium hornum</i> (M)                                                | x     | M1.1 | 5   | 3  | 4  | 6  | 3  | 4  | 46               | 0.1±0.0  | 46  | 0.1±0.1 | 71                | 1.6±0.6  | 71  | 0.6±0.1 | 21                 | 0.1±0.1  | 7  | +       |
| <i>Dicranella heteromalla</i> (M)                                      | x     | M2.1 | 5   | 4  | 5  | 4  | 2  | 3  | 15               | +        | 15  | +       | .                 | .        | .   | .       | 14                 | +        | 3  | +       |
| <i>Abies alba</i>                                                      | x     | T1.1 | 3   | 5  | 4  | x  | x  | x  | 8                | 0.1±0.1  | 15  | 0.1±0.1 | .                 | .        | .   | .       | .                  | .        | 7  | +       |
| <i>Sorbus aucuparia</i>                                                | x     | T2.1 | 6   | x  | x  | x  | 4  | x  | 8                | 0.1±0.1  | 8   | +       | 21                | 0.1±0.0  | 14  | 0.1±0.1 | .                  | .        | .  | .       |
| <i>Leucobryum glaucum</i> (M)                                          | CF    | M2.1 | 5   | 3  | 4  | 7  | 1  | 2  | 8                | +        | .   | .       | .                 | .        | .   | .       | 10                 | 0.1±0.1  | 3  | +       |
| <i>Fissidens taxifolius</i> (M)                                        | x     | M2.1 | 5   | 4  | 5  | 6  | 7  | 5  | .                | .        | 8   | 0.1±0.1 | 7                 | +        | .   | .       | .                  | .        | .  | .       |
| <i>Isoetecium myosuroides</i> (M)                                      | QF    | M1.1 | 4   | 4  | 4  | 6  | 4  | 3  | .                | .        | 8   | +       | .                 | .        | 7   | +       | 3                  | +        | 7  | +       |
| <i>Corylus avellana</i>                                                | QF    | S2.1 | 6   | 5  | 3  | x  | x  | 5  | .                | .        | .   | .       | 86                | 2.8±0.6  | 79  | 1.5±0.3 | .                  | .        | .  | .       |
| <i>Melica uniflora</i>                                                 | QF    | H1.1 | 3   | 5  | 2  | 5  | 6  | 6  | .                | .        | .   | .       | 71                | 3.2±1.4  | 79  | 1.8±0.9 | .                  | .        | .  | .       |
| <i>Digitalis purpurea</i>                                              | Clear | H1.2 | 7   | 5  | 2  | 5  | 3  | 6  | .                | .        | .   | .       | 43                | 0.3±0.1  | 43  | 0.1±0.0 | 3                  | +        | .  | .       |
| <i>Poa chaixii</i>                                                     | x     | H2.1 | 6   | 5  | 4  | 5  | 3  | 4  | .                | .        | .   | .       | 36                | 0.2±0.1  | 29  | 0.2±0.1 | .                  | .        | .  | .       |
| <i>Acer pseudoplatanus</i>                                             | QF    | T2.1 | 4   | x  | 4  | 6  | x  | 7  | .                | .        | .   | .       | 29                | 0.1±0.1  | 14  | 0.1±0.0 | .                  | .        | .  | .       |
| <i>Sorbus aria</i>                                                     | QF    | T2.1 | 6   | 5  | 2  | 4  | 7  | 3  | .                | .        | .   | .       | 21                | 0.2±0.1  | 7   | +       | .                  | .        | .  | .       |
| <i>Milium effusum</i>                                                  | QF    | H1.1 | 4   | x  | 3  | 5  | 5  | 5  | .                | .        | .   | .       | 14                | +        | 14  | +       | .                  | .        | .  | .       |
| <i>Rhytidiadelphus squarrosus</i> (M)                                  | x     | M2.2 | 7   | 3  | 6  | 6  | 5  | 4  | .                | .        | .   | .       | 14                | 0.1±0.0  | 7   | 0.2±0.2 | .                  | .        | .  | .       |

Table S1. Continued

|                                   | Com   | FA   | EIV |    |    |    |    |    | Grünberg (GB-DF) |        |      |        | Eselskopf (EK-DF) |        |      |         | Adelsberg (AB-NAT) |         |      |         |
|-----------------------------------|-------|------|-----|----|----|----|----|----|------------------|--------|------|--------|-------------------|--------|------|---------|--------------------|---------|------|---------|
|                                   |       |      | L   | T  | C  | M  | R  | N  | 2005             |        | 2017 |        | 2005              |        | 2017 |         | 2001               |         | 2016 |         |
|                                   |       |      |     |    |    |    |    |    | F                | mCv±SE | F    | mCv±SE | F                 | mCv±SE | F    | mCv±SE  | F                  | mCv±SE  | F    | mCv±SE  |
| <i>Festuca altissima</i>          | QF    | H1.1 | 3   | 5  | 3  | 5  | 4  | 6  | .                | .      | .    | .      | 7                 | +      | 7    | 0.1±0.1 | .                  | .       | .    | .       |
| <i>Galium saxatile</i>            | GH    | H2.1 | 7   | 5  | 2  | 5  | 2  | 3  | .                | .      | .    | .      | 7                 | +      | 7    | +       | .                  | .       | .    | .       |
| <i>Sambucus nigra</i>             | x     | S2.1 | 7   | 5  | 3  | 5  | x  | 9  | .                | .      | .    | .      | .                 | .      | 14   | +       | 3                  | +       | 3    | +       |
| <i>Betula pendula</i>             | x     | T2.1 | 7   | x  | x  | x  | x  | x  | .                | .      | .    | .      | .                 | .      | 7    | +       | 3                  | +       | .    | .       |
| <i>Dactylis glomerata</i>         | x     | H2.2 | 7   | x  | 3  | 5  | x  | 6  | .                | .      | .    | .      | .                 | .      | 7    | +       | 7                  | +       | .    | .       |
| <i>Senecio sylvaticus</i>         | Clear | H1.2 | 8   | 6  | 3  | 5  | 5  | 8  | .                | .      | .    | .      | .                 | .      | 7    | +       | 3                  | +       | .    | .       |
| <i>Veronica officinalis</i>       | x     | H2.1 | 6   | x  | 3  | 4  | 3  | 4  | .                | .      | .    | .      | .                 | .      | 7    | +       | 7                  | +       | .    | .       |
| <i>Tilia cordata</i>              | QF    | T1.1 | 5   | 5  | 4  | 5  | x  | 5  | .                | .      | .    | .      | .                 | .      | .    | .       | 86                 | 1.5±0.3 | 93   | 2.0±0.4 |
| <i>Pteridium aquilinum</i>        | x     | H2.1 | 6   | 5  | 3  | 5~ | 3  | 3  | .                | .      | .    | .      | .                 | .      | .    | .       | 38                 | 2.9±1.0 | 28   | 3.1±1.2 |
| <i>Isoetes alopeuroides</i> (M)   | QF    | M1.1 | 5   | 4  | 6  | 5  | 6  | 5  | .                | .      | .    | .      | .                 | .      | .    | .       | 21                 | +       | 3    | +       |
| <i>Plagiochila porellodes</i> (M) | x     | M1.1 | 6   | 3  | 5  | 5  | 7  | 4  | .                | .      | .    | .      | .                 | .      | .    | .       | 21                 | 0.1±0.0 | 7    | +       |
| <i>Carex pairae</i>               | Clear | H2.1 | nv  | nv | nv | nv | nv | nv | .                | .      | .    | .      | .                 | .      | .    | .       | 17                 | 0.1±0.0 | 14   | 0.1±0.0 |
| <i>Festuca cinerea</i>            | GH    | O    | 9   | 7  | 4  | 2  | x  | 1  | .                | .      | .    | .      | .                 | .      | .    | .       | 10                 | 0.1±0.0 | 7    | 0.1±0.0 |
| <i>Danthonia decumbens</i>        | GH    | H2.2 | 8   | x  | 2  | x  | 3  | 2  | .                | .      | .    | .      | .                 | .      | .    | .       | 7                  | 0.1±0.0 | 10   | 0.1±0.1 |
| <i>Polypodium vulgare</i>         | QF    | H2.1 | 5   | 5  | 3  | 4  | 2  | 2  | .                | .      | .    | .      | .                 | .      | .    | .       | 7                  | +       | 3    | +       |
| <i>Calamagrostis epigejos</i>     | x     | H2.1 | 7   | 5  | 7  | x~ | x  | 6  | .                | .      | .    | .      | .                 | .      | .    | .       | 3                  | +       | 3    | +       |



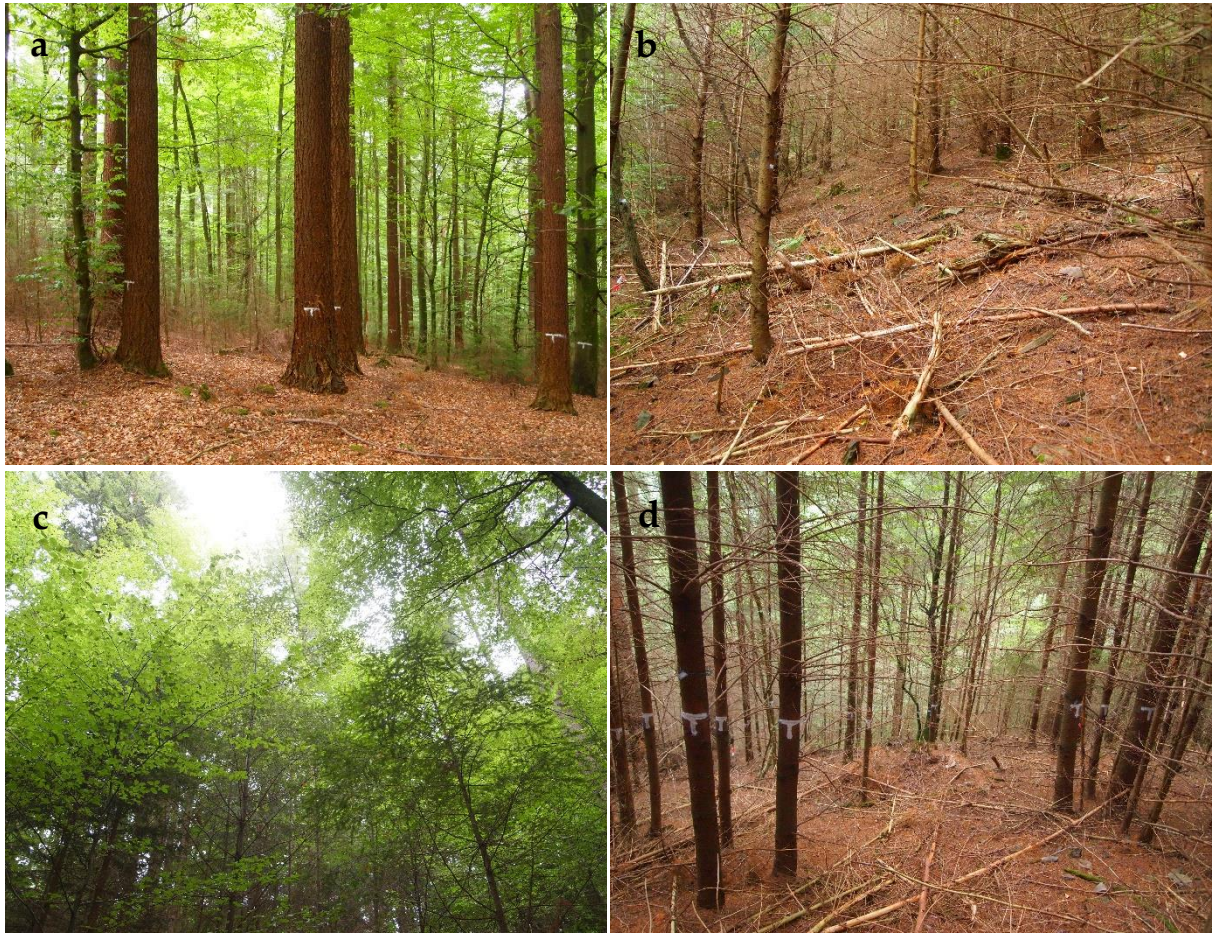

**Figure S1.** Impressions from the core areas of the strict forest reserves (SFRs) dominated by Douglas fir. a) Core area of the SFR Grünberg; b) Core areas of the SFR Eselskopf; c) Core area of the SFR Grünberg with dominating beech in the lower tree layer; d) Core area of the SFR Eselskopf in the stem exclusion stage.
